# Supplementary material for: Variation of Detailed Protein Composition of Cow Milk Predicted from a Large Database of Mid-Infrared Spectra
Source: MDPI journal article supplement (doi:10.3390/ani9040176), 2019-04-18

## Supplementary files: Variation of Detailed Protein Composition of Cow Milk Predicted from a Large Database of Mid-Infrared Spectra

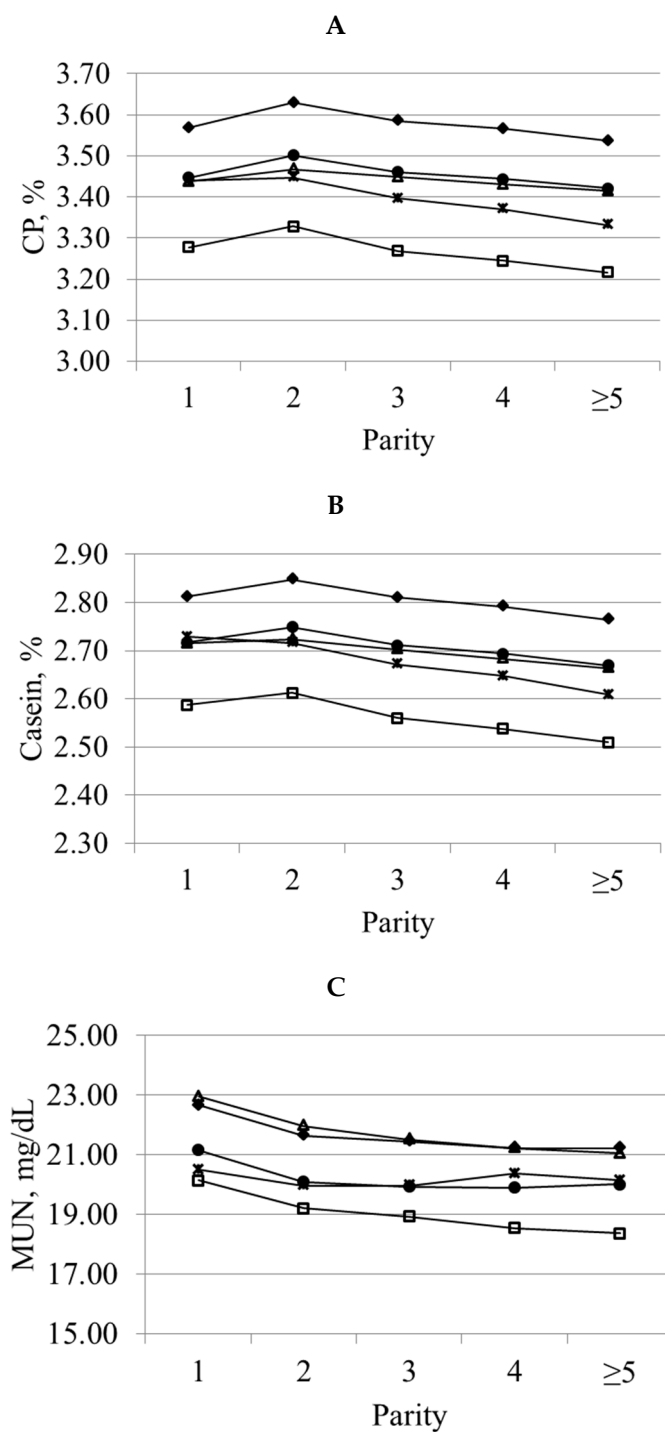

**Figure S1.** Least squares means of (A) crude protein (CP), (B) casein and (C) milk urea nitrogen (MUN) across parity for Brown Swiss (-♦-), Holstein-Friesian (-□-), Alpine Grey (-△-), Simmental (-●-) and Pinzgauer (-×-) cows.

**Figure S2.** Least squares means of (A) crude protein (CP), (B) casein and (C) milk urea nitrogen (MUN) across lactation for Brown Swiss (-♦-), Holstein-Friesian (-□-), Alpine Grey (-△-), Simmental (-●-) and Pinzgauer (-x-)

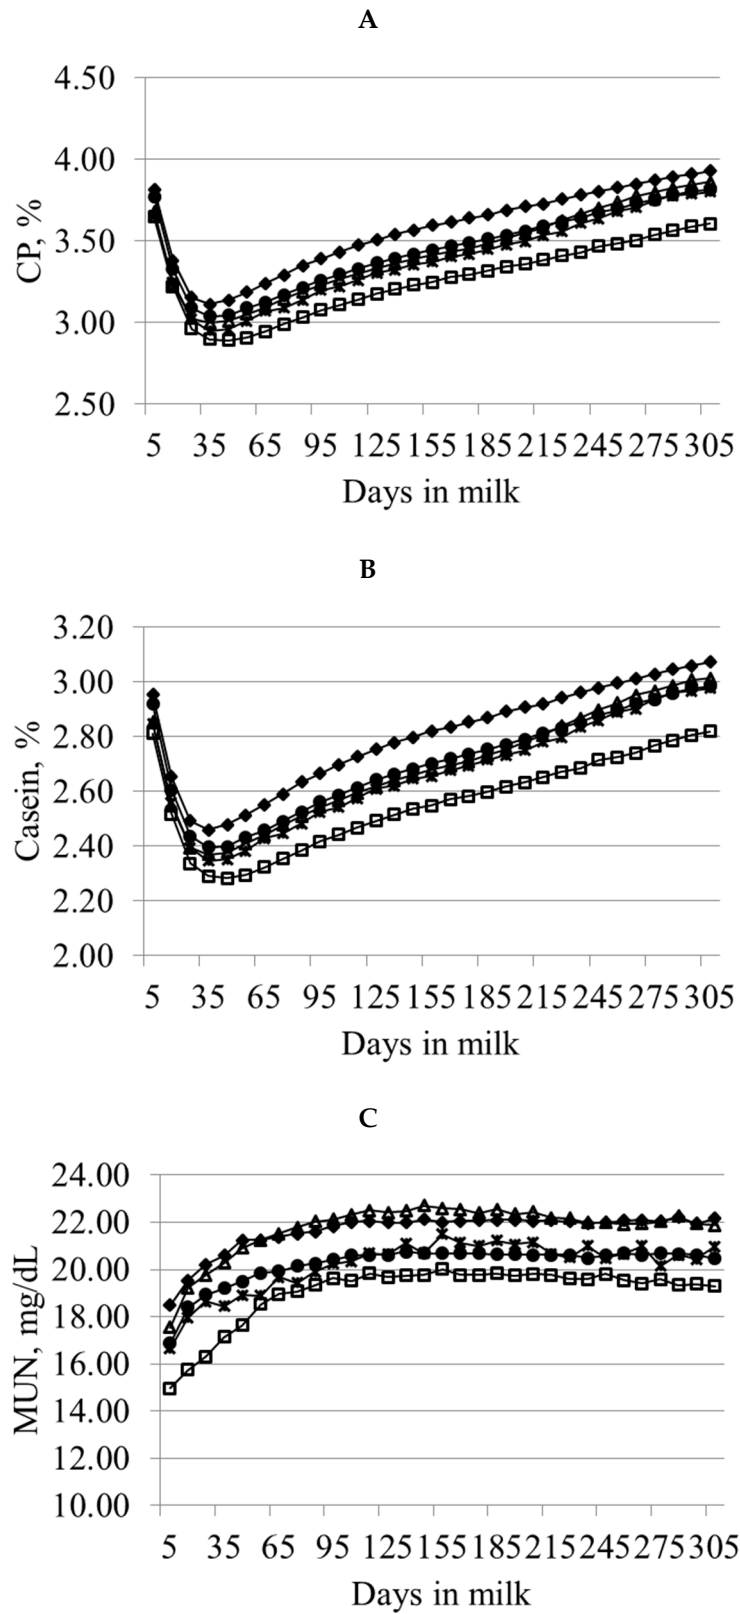

**Figure S3.** Least squares means of (A) crude protein (CP), (B) casein and (C) milk urea nitrogen (MUN) across month of sampling for Brown Swiss (-♦-), Holstein-Friesian (-□-), Alpine Grey (-△-), Simmental (-●-) and Pinzgauer (-x-) cows.

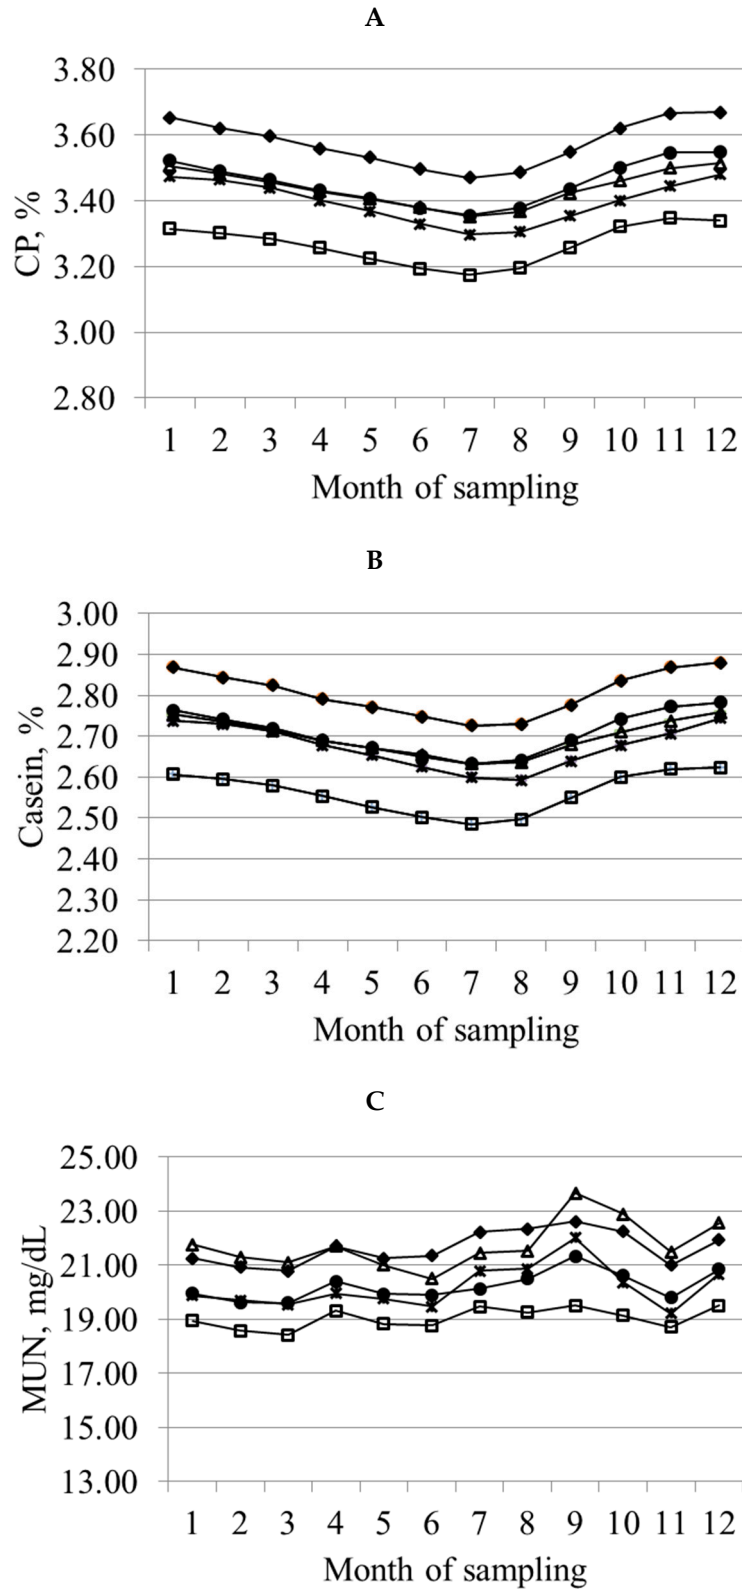

Supplement: s1 [file s1]
